# Supplementary material for: Asialoglycoprotein receptor 1 mediates productive uptake of N-acetylgalactosamine-conjugated and unconjugated phosphorothioate antisense oligonucleotides into liver hepatocytes
Source: PubMed Central journal article supplement — Nucleic Acids Res. 2017 Oct 23;45(21):12388–400. doi: 10.1093/nar/gkx960 (PMC5716100; doi:10.1093/nar/gkx960), 2017-10-23
Supplement: gkx960_supp.pdf [file gkx960_supp.pdf]

# Supplementary Information

S1

### Phosphorothioate ASO

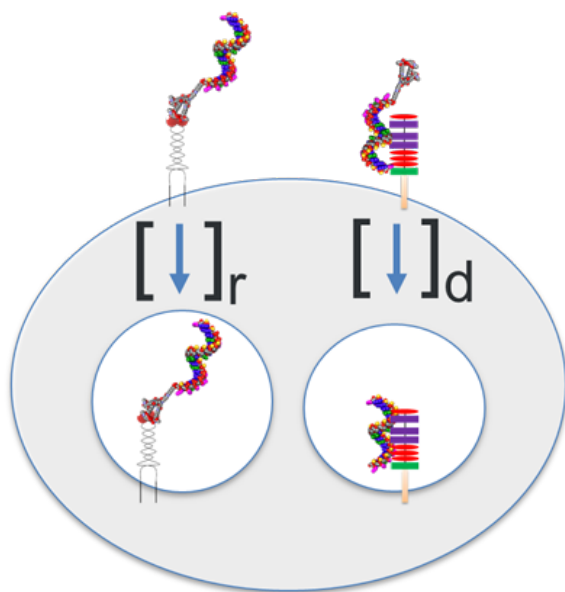

### Phosphodiester ASO

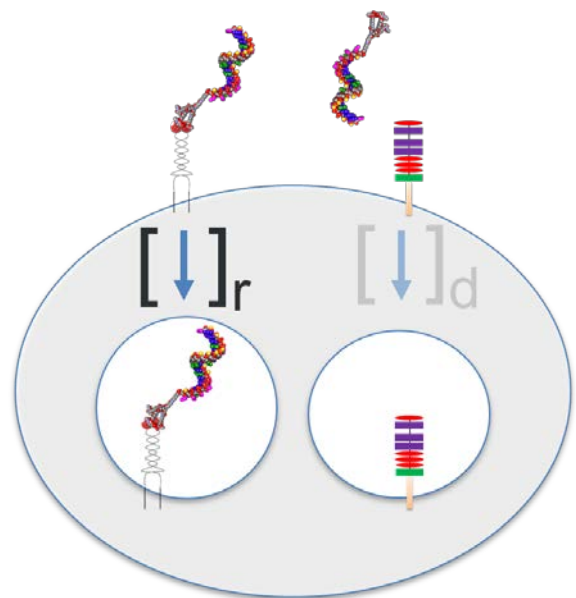

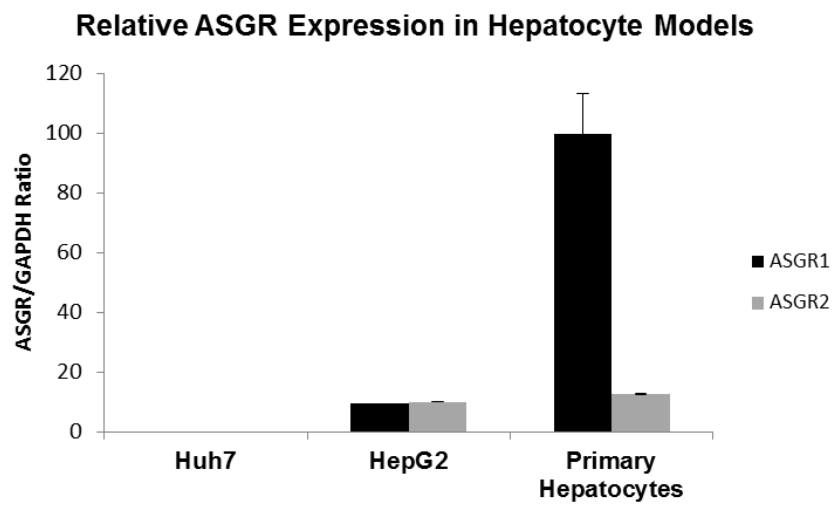

## WT HEK 293

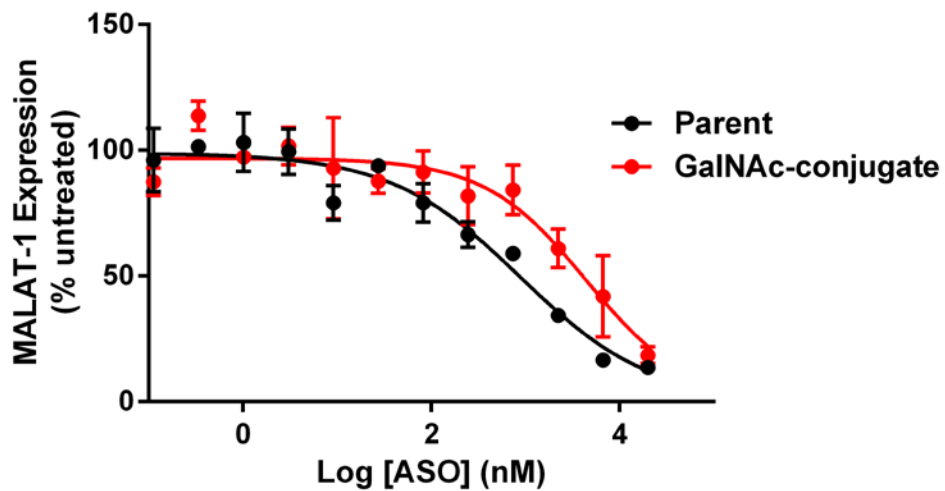

| ASO       | 5-10-5 MOE Parent | 5-10-5 MOE GalNAc |
|-----------|-------------------|-------------------|
| IC50 (nM) | 845               | 3865              |

## ASGR1 HEK 293

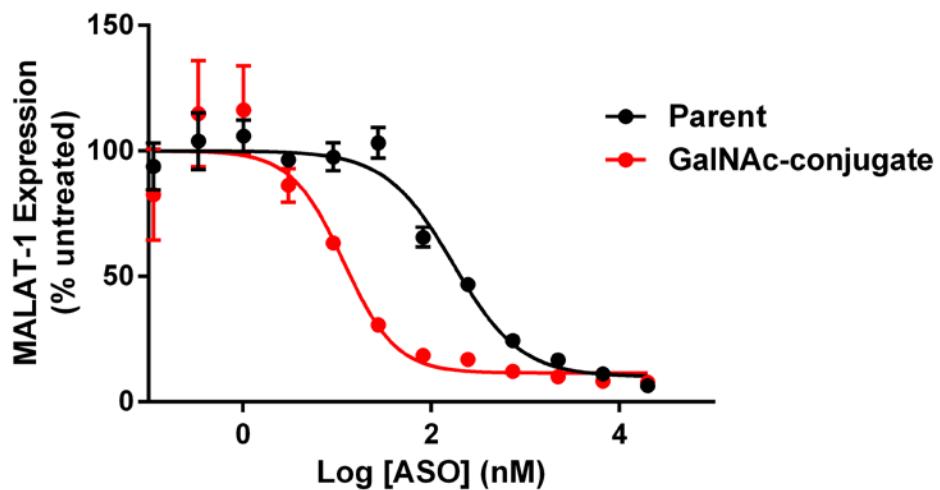

| ASO       | 5-10-5 MOE Parent | 5-10-5 MOE GalNAc |
|-----------|-------------------|-------------------|
| IC50 (nM) | 243               | 17                |

### ASGR1-HEK (Clone 1A4)

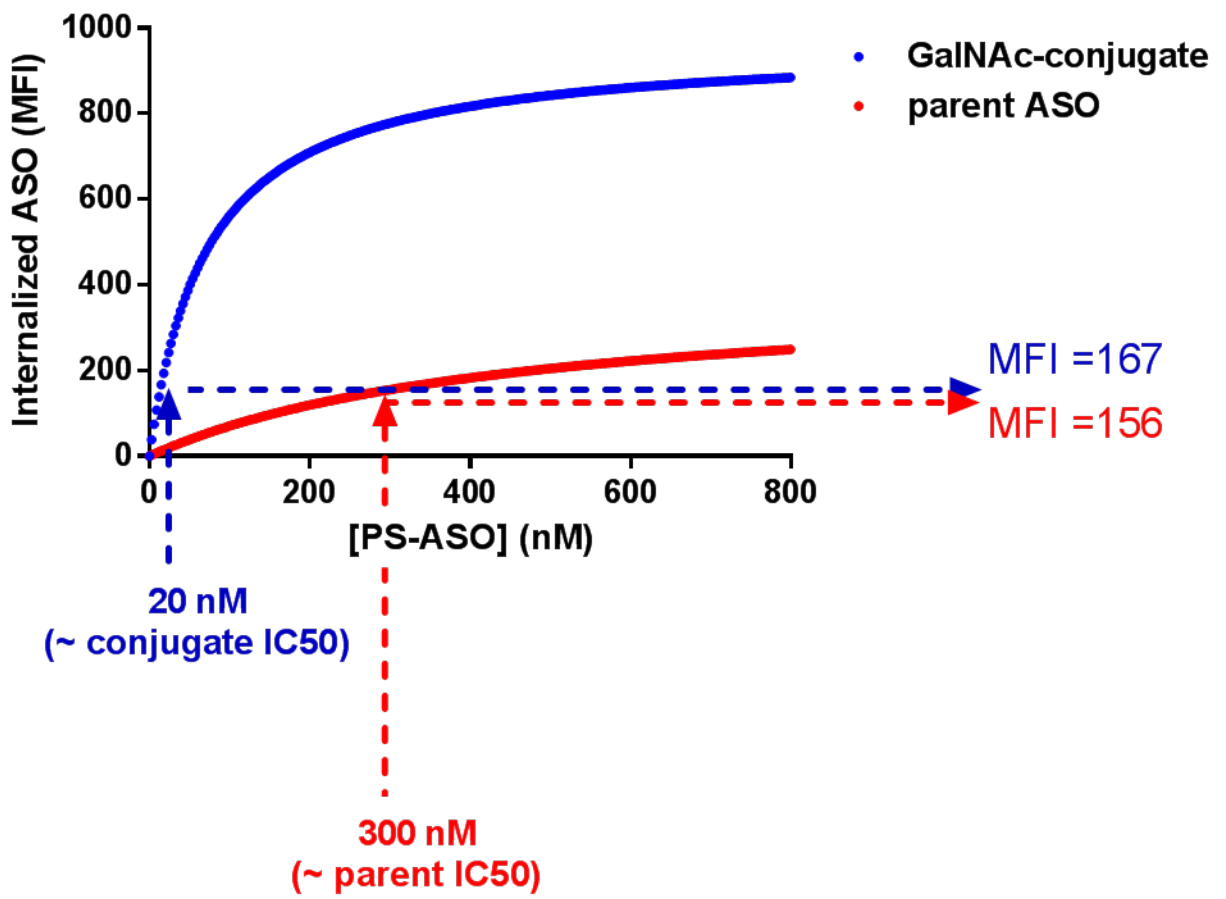

**Table S1. Analytical data for ASOs**

| <b>ASO No.</b> | <b>Chemistry</b>                       | <b>Calculated<br/>Mass</b> | <b>Observed<br/>Mass</b> | <b>%UV<br/>Purity</b> |
|----------------|----------------------------------------|----------------------------|--------------------------|-----------------------|
| 395251         | MOE, DNA, PS                           | 7249.3                     | 7248.1                   | 94                    |
| 890273         | MOE, DNA, PS, 3'-GalNAc                | 8767.9                     | 8766.8                   | 97                    |
| 730436         | MOE, DNA, PS, 5'-Cy3                   | 7772.9                     | 7770.5                   | 77                    |
| 836716         | MOE, DNA, PS, 5'-Cy3, 3'-GalNAc        | 9291.5                     | 9291.7                   | 94                    |
| 834490         | MOE, PO, 5'-Cy3                        | 8208.5                     | 8208.5                   | 82                    |
| 841226         | MOE, PO, 5'-Cy3, 3'-GalNAc             | 9727.1                     | 9727.6                   | 97                    |
| 890266         | MOE, DNA, 6PO, 13PS                    | 7152.9                     | 7151.0                   | 87                    |
| 890267         | MOE, DNA, 6PO, 13PS, 3'-GalNAc         | 8671.5                     | 8672.2                   | 92                    |
| 890268         | MOE, DNA, 6PO, 13PS, 5'-Cy3            | 7676.5                     | 7675.2                   | 88                    |
| 890269         | MOE, DNA, 6PO, 13PS, 5'-Cy3, 3'-GalNAc | 9195.1                     | 9194.5                   | 95                    |
| 758054         | cEt BNA, DNA, PS                       | 5430.6                     | 5429.4                   | 91                    |
| 404071         | MOE, DNA, PS                           | 7234.3                     | 7233.1                   | 99                    |
| 757741         | cEt BNA, DNA, PS                       | 5420.6                     | 5419.2                   | 93                    |

## Supplementary Figure Legends

**S1** Illustration of the relative contributions of phosphorothioate-, phosphodiester- and receptor-mediated uptake of parent ASOs and their respective conjugates.

Phosphorothioate-ligand conjugates internalize via “default” PS pathway (brackets noted as “d”) and a receptor-mediated pathway (brackets noted as “r”), whereas phosphodiester-ligand conjugates are internalized almost exclusively by the receptor pathway.

**S2** Relative mRNA levels of ASGR1 and ASGR2 in Huh7, HepG2 and, primary murine hepatocytes. RNA purified from the indicated cells was subjected qRT-PCR for the ASGR1, ASGR2, and GAPDH. Expression was normalized to GAPDH mRNA and expressed as percent primary murine hepatocyte expression.

**S3** ASGR1 expressing HEK 293 show increased sensitivity to unconjugated phosphorothioate ASOs. Parental and ASGR1-expressing HEK 293 cells were treated with the indicated ASO for potency determination as described in “Material and Methods”

**S4** Interpolated values for cy3-ASO (730436, 836716 from Table S1) uptake at all concentrations of applied cy3-ASO were calculated in order to compare cy3-ASO uptake of the parent and GalNAc-conjugated ASOs at the IC<sub>50</sub>'s of their respective unlabeled gapmers (395251, 890273 from Table S1), as indicated in the figure.

**Table S1** Analytical data for ASOs used in this manuscript
